# Supplementary material for: Cobalt Impregnation on Titania Photocatalysts Enhances Vis Phenol Photodegradation
Source: MDPI journal article supplement (doi:10.3390/ma16114134), 2023-06-01
Supplement: s1 [file s1]

# **Supplementary Information**

*Article*

## **Cobalt Impregnation on Titania Photocatalysts Enhances Vis Phenol Photodegradation**

**Soukayna Belekbir <sup>1</sup>, Mohammed El Azzouzi <sup>1</sup>, Laura Rodríguez-Lorenzo <sup>2</sup>, Adnane El Hamidi <sup>1</sup>, Juan Arturo Santaballa <sup>3,\*</sup> and Moisés Canle <sup>3,\*</sup>**

<sup>1</sup> Laboratory of Nanomaterials, Nanotechnologies and Environment, Center of Materials Science, Faculty of Sciences, Mohammed V University in Rabat, Rabat BP 1014, Morocco

<sup>2</sup> INL—International Iberian Nanotechnology Laboratory, Water Quality Group, Av. Mestre José Veiga, 4715-330 Braga, Portugal

<sup>3</sup> React! Group, Department of Chemistry, Faculty of Sciences & CICA, University of A Coruña, E-15071 A Coruña, Spain

\* Correspondence: arturo.santaballa@udc.es (J.A.S.); moises.canle@udc.es (M.C.)

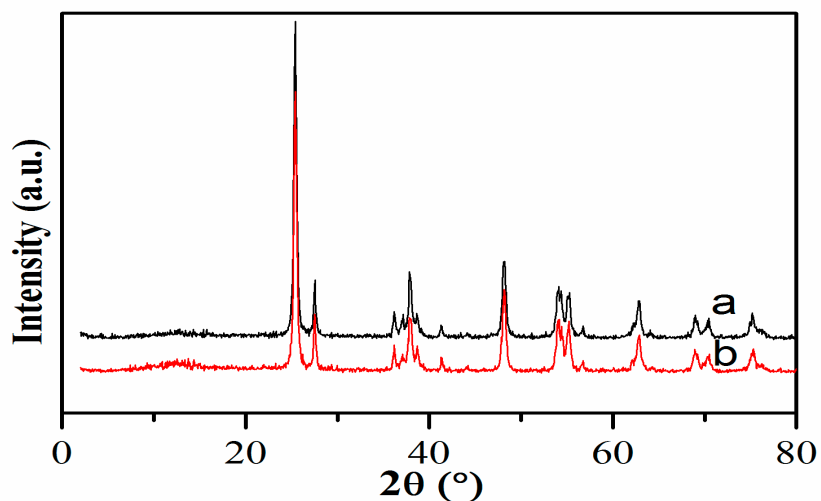

**Figure S1.** Diffractograms of Co(0.1%)/TiO<sub>2</sub>, a: before leaching test, b: after leaching test.

**Table S1:** Raman peak centred at 143 cm<sup>-1</sup> as a function of laser line and laser's power.

| <i>Laser power</i> | <i>Laser line</i>                      | <b>633 nm</b> |                                 | <b>785 nm</b> |                                 |
|--------------------|----------------------------------------|---------------|---------------------------------|---------------|---------------------------------|
|                    | <i>Photocatalyst</i>                   | <b>P25</b>    | <b>Co(0.1%)/TiO<sub>2</sub></b> | <b>P25</b>    | <b>Co(0.1%)/TiO<sub>2</sub></b> |
| <b>21-28 mW</b>    | <i>Peak position (cm<sup>-1</sup>)</i> | 141           | 141                             | 144           | 144                             |
|                    | <i>Height (CCD cts)</i>                | 10160         | 12954                           | 9620          | 18381                           |
|                    | <i>FWHM (cm<sup>-1</sup>)</i>          | 4.34          | 19.7                            | 14.1          | 14.4                            |
| <b>10 mW</b>       | <i>Peak position (cm<sup>-1</sup>)</i> | 141           | 141                             | n.a.          | n.a.                            |
|                    | <i>Height (CCD cts)</i>                | 1304          | 2250                            | n.a.          | n.a.                            |
|                    | <i>FWHM (cm<sup>-1</sup>)</i>          | 15.07         | 15.63                           | n.a.          | n.a.                            |
| <b>35 mW</b>       | <i>Peak position (cm<sup>-1</sup>)</i> | n.a.          | n.a.                            | 144           | 144                             |
|                    | <i>Height (CCD cts)</i>                | n.a.          | n.a.                            | 15831         | 45907                           |
|                    | <i>FWHM (cm<sup>-1</sup>)</i>          | n.a.          | n.a.                            | 13.9          | 14.0                            |

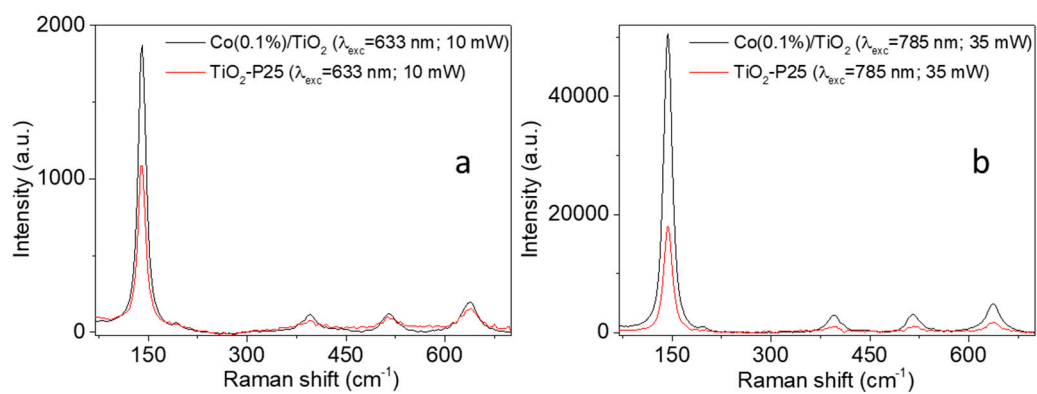

**Figure S2:** Raman spectra of  $\text{TiO}_2\text{-P25}$  and  $\text{Co}(0.1\%)/\text{TiO}_2$  acquired using (a) 633 nm and (b) 785 nm excitation laser line.

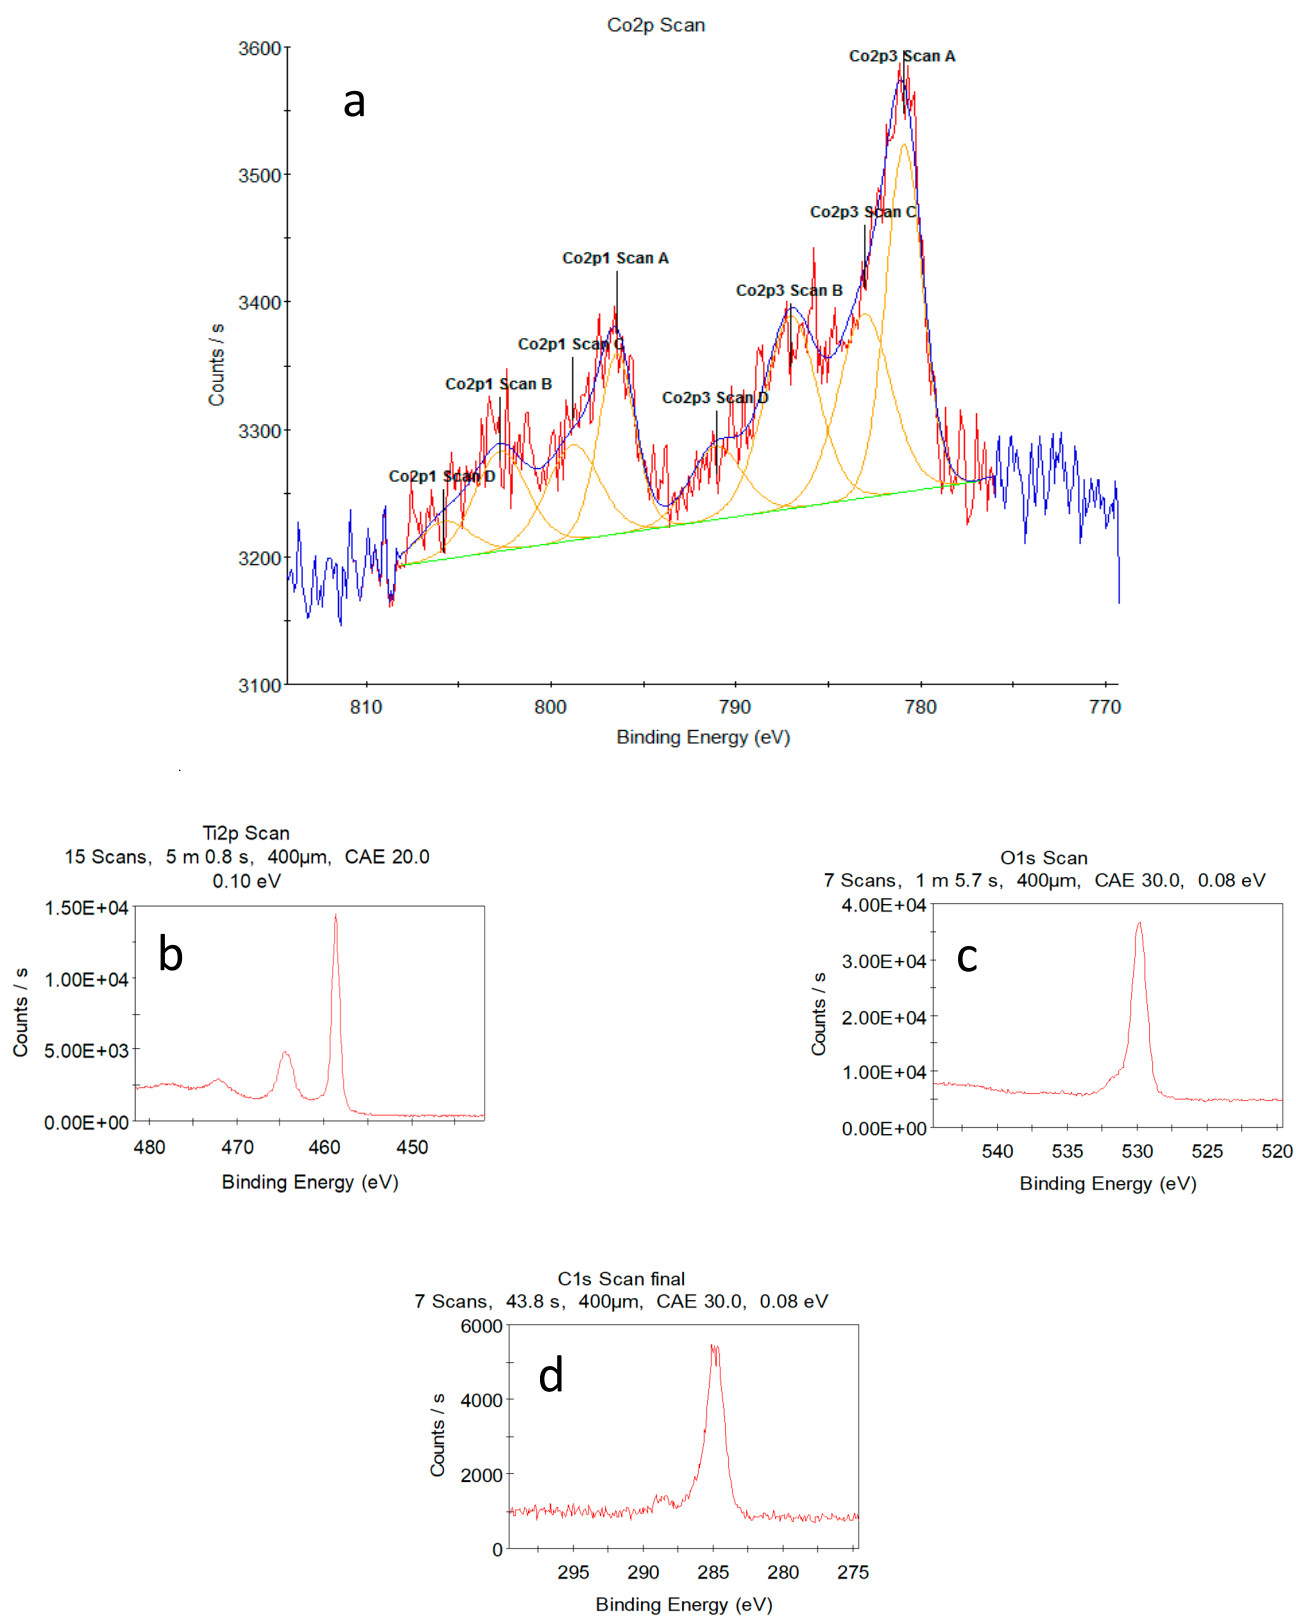

**Figure S3.** XPS spectra (a) Co 2p scan and fitting; (b) Ti 2p scan; (c) O 1s scan; (d) C 1s scan.

**Table S2:** Band gap for TiO<sub>2</sub>-P25 and Co doped TiO<sub>2</sub> photocatalysts synthesized by different methods.

| Photocatalyst         | Co<br>(%wt) | Synthetic<br>method        | Band<br>gap<br>(eV) | Reference (DOI)                                               |
|-----------------------|-------------|----------------------------|---------------------|---------------------------------------------------------------|
| TiO <sub>2</sub> -P25 | --          | --                         | 3.30                | This work                                                     |
| Co/TiO <sub>2</sub>   | 0.1         | Impregnation               | 2.4                 | This work                                                     |
| Co/TiO <sub>2</sub>   | 0.1         | Sol-gel                    | 2.66                | 10.1007/s10971-015-3715-3                                     |
| Co/TiO <sub>2</sub>   | 0.1         | Sol-gel                    | 2.77                | 10.3390/ma11101946                                            |
| Co/TiO <sub>2</sub>   | 0.1         | Coprecipitation            | 2.78                | 10.1016/j.matchemphys.2012.04.062                             |
| Co/TiO <sub>2</sub>   | 0.3         | Impregnation               | 2.3                 | This work                                                     |
| Co/TiO <sub>2</sub>   | 0.3         | Sol-gel                    | 3.00                | 10.5004/dwt.2017.20205                                        |
| Co/TiO <sub>2</sub>   | 0.5         | Impregnation               | 2.3                 | This work                                                     |
| Co/TiO <sub>2</sub>   | 0.5         | Sol-gel                    | 2.48                | 10.1016/j.sajce.2017.10.001                                   |
| Co/TiO <sub>2</sub>   | 0.5         | Hydrothermal               | 3.19                | 10.1016/j.apcatb.2016.03.003<br>1-s2.0-S0926337316301692-main |
| Co/TiO <sub>2</sub>   | 0.5         | Sol-gel &<br>Precipitation | 3.24                | 10.1016/j.chemosphere.2020.128931                             |
| Co/TiO <sub>2</sub>   | 0.67        | Sol-gel                    | 3.02                | 10.1016/j.jwpe.2017.02.015<br>1-s2.0-S2214714416305256-main   |
| Co/TiO <sub>2</sub>   | 1.0         | Impregnation               | 2.3                 | This work                                                     |
| Co/TiO <sub>2</sub>   | 1.0         | Sol-gel                    | 1.97                | 10.1007/s10971-015-3715-3                                     |
| Co/TiO <sub>2</sub>   | 1.0         | Hydrothermal               | 3.13                | 10.1016/j.apcatb.2016.03.003<br>1-s2.0-S0926337316301692-main |
| Co/TiO <sub>2</sub>   | 1.0         | Sol-gel &<br>Precipitation | 3.05                | 10.1016/j.chemosphere.2020.128931                             |

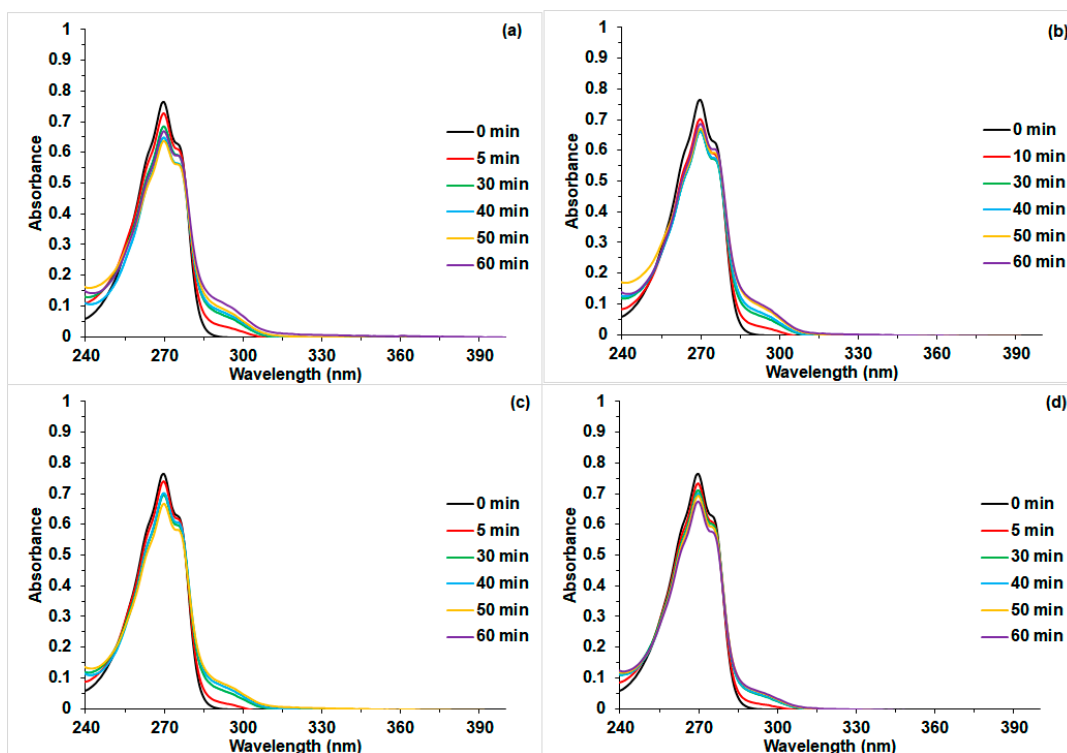

**Figure S4:** Time-resolved UV-Vis spectra of phenol during its UV irradiation in the presence of (a) Co(0.1%)/TiO<sub>2</sub>, (b) Co(0.3%)/TiO<sub>2</sub>, (c) Co(0.5%)/TiO<sub>2</sub>, (d) Co(1%)/TiO<sub>2</sub>. [Phenol] = 50 ppm; Photocatalysts = 1 g·L<sup>-1</sup>, T *ca.* 25°C, natural pH.

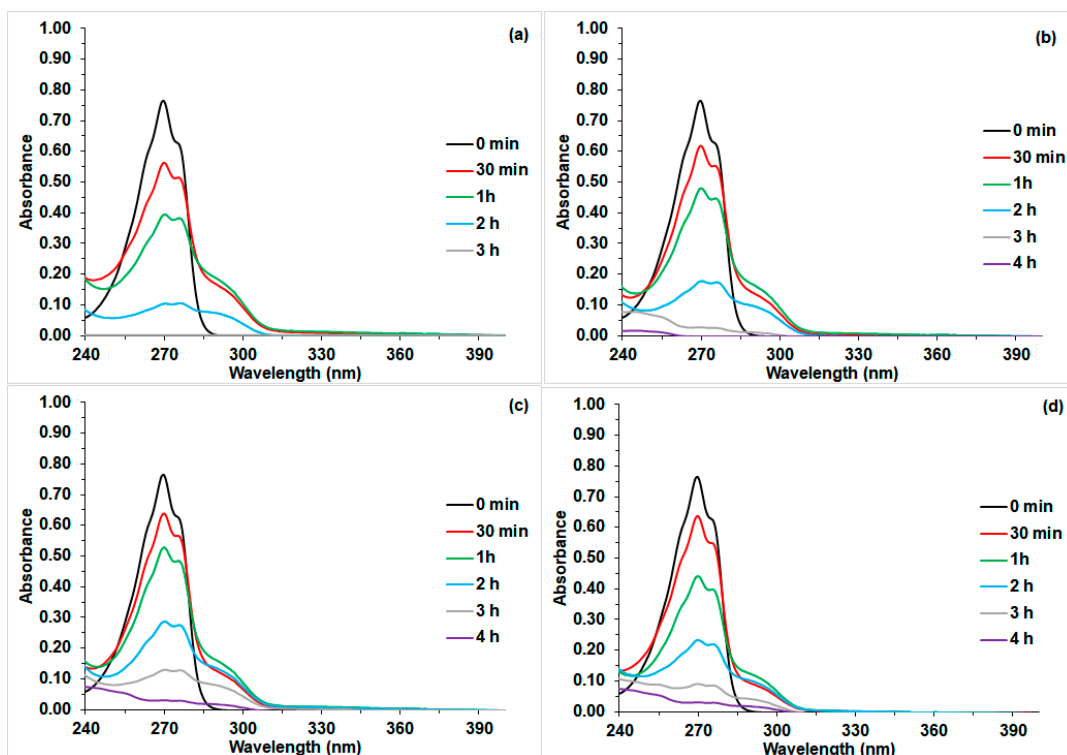

**Figure S5:** Time-resolved UV-Vis spectra of phenol during Vis irradiation in the presence of (a) Co(0.1%)/TiO<sub>2</sub>, (b) Co(0.3%)/TiO<sub>2</sub>, (c) Co(0.5%)/TiO<sub>2</sub>, (d) Co(1%)/TiO<sub>2</sub>. [Phenol] = 50 ppm; Photocatalyst = 1 g·L<sup>-1</sup>, T *ca.* 25°C, natural pH.
